# Supplementary material for: CHIT1 at Diagnosis Reflects Long‐Term Multiple Sclerosis Disease Activity
Source: PubMed Central journal article supplement — Ann Neurol. 2020 Feb 8;87(4):633–45. doi: 10.1002/ana.25691 (PMC7187166; doi:10.1002/ana.25691), 2020-02-08
Supplement: ANA-87-633-s001.pdf [file ANA-87-633-s001.pdf]

## Supplementary material

**Supplementary table 1. Genetics cohort population characteristics**

| Characteristics                                         | Subcohorts with measures of disease activity |                       |                    |                |
|---------------------------------------------------------|----------------------------------------------|-----------------------|--------------------|----------------|
|                                                         | Total<br>(N=604)                             | Disability<br>(N=563) | Relapse<br>(N=511) | MRI<br>(N=208) |
| Gender: Female/Male (% Female)                          | 409/195 (68%)                                | 383/180 (68%)         | 359/152 (70%)      | 149/59 (72%)   |
| Disease Course: bout onset (BO) /PP/unknown (% BO)      | 526/63/15 (87%)                              | 486/62/15 (86%)       | 511/0/0 (100%)     | 203/2/3 (98%)  |
| Age at onset (yrs): median (IQR)                        | 32 (25-41)                                   | 32 (25-41)            | 31 (24-39)         | 29 (23-38)     |
| Time from onset to most recent EDSS (yrs): median (IQR) | —                                            | 12 (6-18)             | —                  | —              |
| EDSS most recent: median (IQR)                          | —                                            | 2 (1-5)               | —                  | —              |
| ARMSS most recent: median (IQR)                         | —                                            | 3.22 (1.28-6.00)      | —                  | —              |
| Time before treatment from onset (yrs): median (IQR)    | —                                            | —                     | 2 (0-5)            | —              |
| Annualized relapse rate before treatment: median (IQR)  | —                                            | —                     | 0.67 (0.25-1.6)    | —              |
| Total follow-up time from onset (yrs): median (IQR)     | —                                            | —                     | 13 (7-20)          | —              |
| Annualized relapse rate, total: median (IQR)            | —                                            | —                     | 0.29 (0.17-0.46)   | —              |
| Time from onset to MRI (yrs): median (IQR)              | —                                            | —                     | —                  | 8 (4-14)       |

ARMSS = Age-related Multiple Sclerosis Severity Score, yrs= years, BO = bout onset, EDSS = Expanded Disability Status Scale, IQR=Interquartile Range, PP = primary progressive

**Supplementary table 2. Biomarker measurement quality control.**

|                     | <b>N<br/>measured</b> | <b>Inter-plate CV<br/>(%)</b> | <b>Within-plate mean CV<br/>(%)</b> | <b>N<br/>CV&gt;25%</b> | <b>N &lt; or &gt;<br/>detection<br/>range</b> | <b>N included<br/>(%)</b> |
|---------------------|-----------------------|-------------------------------|-------------------------------------|------------------------|-----------------------------------------------|---------------------------|
| <b>CSF N = 143</b>  |                       |                               |                                     |                        |                                               |                           |
| NfL                 | 143                   | 12.30%                        | 13.46%                              | 15                     | 1 < and 6 >                                   | 122 (85.3%)               |
| CHIT1               | 143                   | 6.60%                         | 5.91%                               | 5                      | 6 < and 1 >                                   | 129 (90.2%)               |
| CHI3L1              | 143                   | 17.70%                        | 3.38%                               | 0                      | 1 < and 1 >                                   | 141 (98.6%)               |
| sTREM2              | 140                   | 10.1%                         | 7.08%                               | 7                      | 20 <                                          | 113 (80.7%)               |
| <b>Serum N = 78</b> |                       |                               |                                     |                        |                                               |                           |
| CHIT1               | 78                    | 7.80%                         | 4.5%                                | 0                      | 0                                             | 78 (100%)                 |

CV = coefficient of variation.

**Supplementary table 3. Overview of MRI scanning protocols.**

| Protocol | Number of scans (%) | Scanner         | Sequence | Flip Angle (°) | Echo Time (ms) | Repetition Time (ms) | Pixel Spacing (mm x mm)           | Slice Thickness (mm) |
|----------|---------------------|-----------------|----------|----------------|----------------|----------------------|-----------------------------------|----------------------|
| <b>A</b> | 9 (11%)             | Achieva         | MTR      | 15             | 7.99 or 8.0    | 68.62                | 1.00x1.00                         | 3                    |
|          |                     |                 | 3D-TFE   | 8              | 4.6            | 9.55-9.63            | 0.87x0.87 or 0.98x0.98            | 1.2                  |
|          |                     |                 | 3D-FLAIR | 90             | 339.29-406.27  | 4800                 | 1.04x1.04                         | 1.12                 |
| <b>B</b> | 4 (5%)              | Achieva dstream | MTR      | 10             | 4.59           | 67.81                | 1.00x1.00                         | 3                    |
|          |                     |                 | 3D-TFE   | 8              | 4.6            | 9.53-9.61            | 0.98x0.98                         | 1.2                  |
|          |                     |                 | 3D-FLAIR | 90             | 331.86-366.83  | 4800                 | 1.04x1.04                         | 1.12                 |
| <b>C</b> | 17 (22%)            | Ingenia         | MTR      | 10             | 4.59 or 4.6    | 70.66                | 1.14x1.14                         | 3                    |
|          |                     |                 | 3D-TFE   | 8              | 4.6 or 4.61    | 9.59-9.77            | 0.98x0.98                         | 1.2                  |
|          |                     |                 | 3D-FLAIR | 90             | 343.69-404.31  | 4800                 | 1.04x1.04                         | 1.12 or 1.2          |
| <b>D</b> | 36 (46%)            | Ingenia         | MTR      | 10             | 4.59 or 4.6    | 67.75                | 1.00x1.00                         | 3                    |
|          |                     |                 | 3D-TFE   | 8              | 4.6 or 4.61    | 9.57-9.8             | 0.98x0.98, 0.87x0.87 or 0.78x0.78 | 1.2                  |
|          |                     |                 | 3D-FLAIR | 90             | 323.75-407.83  | 4800                 | 1.04x1.04                         | 1.12                 |
| <b>E</b> | 4 (5%)              | Ingenia         | MTR      | 10             | 4.59           | 70.66                | 1.14x1.14                         | 3                    |
|          |                     |                 | 3D-TFE   | 8              | 4.6 or 4.61    | 9.63-9.74            | 0.98x0.98                         | 1.2                  |
|          |                     |                 | 3D-FLAIR | 90             | 345.38-392.99  | 4800                 | 1.04x1.04                         | 1.12 or 1.2          |
| <b>F</b> | 9 (11%)             | Intera          | MTR      | 10             | 4.59           | 82.58                | 1.00x1.00                         | 3                    |
|          |                     |                 | 3D-TFE   | 8              | 4.6            | 9.58-9.65            | 0.98x0.98                         | 1.2                  |
|          |                     |                 | 3D-FLAIR | 90             | 344.47-392.6   | 4800                 | 1.04x1.04                         | 1.2                  |

Number of scans is given for N=79 patients in the CSF analysis cohort.

**Supplementary table 4. Descriptive correlation between potential CSF markers in this study and clinically used CSF characteristics**

| vs            | NfL     |             | CHIT1   |              | CHI3L1  |                 | sTREM2  |         |
|---------------|---------|-------------|---------|--------------|---------|-----------------|---------|---------|
|               | $\beta$ | p-value     | $\beta$ | p-value      | $\beta$ | p-value         | $\beta$ | p-value |
| IgG index     | 0.04    | 0.41        | 0.09    | <b>0.011</b> | 0.25    | <b>0.0016</b>   | 0.13    | 0.10    |
| Albumin ratio | 0.05    | 0.79        | 0.37    | <b>0.037</b> | 0.74    | <b>0.029</b>    | 0.15    | 0.63    |
| OCB positive  | 0.01    | 0.84        | -0.06   | 0.25         | -0.25   | <b>0.037</b>    | -0.07   | 0.49    |
| OCB count     | 2.88    | <b>0.03</b> | 2.79    | <b>0.023</b> | 9.75    | <b>9.16E-05</b> | 4.1     | 0.07    |
| WBC           | -0.02   | 0.90        | 6.22    | 0.33         | 13.2    | 0.30            | -0.10   | 0.99    |

IgG = immunoglobulin G, OCB = oligoclonal bands, WBC = white blood cell count.

Linear regression analysis after applying a log10 transformation to biomarker measurements and an inverse rank normal transformation for WBC count. Age at LP, gender and rs4950928 for CHI3L1 and rs150192398 genotype for CHIT1, were used as covariates. Uncorrected p-values  $p < 0.05$  are indicated in bold.

**Supplementary table 5. Multiple linear regression of baseline CSF biomarkers with clinical and MRI parameters at follow-up.**

| NEDA parameter |            | Variable (outcome)                | NfL     |      | CHIT1   |              | CHI3L1  |      |
|----------------|------------|-----------------------------------|---------|------|---------|--------------|---------|------|
|                |            |                                   | $\beta$ | p    | $\beta$ | p            | $\beta$ | p    |
| Disability     |            | ARMSS (I)                         | 0.10    | 0.66 | 0.69    | <b>0.015</b> | -0.37   | 0.58 |
|                |            | MSSS (II)                         | 0.28    | 0.23 | 0.64    | <b>0.027</b> | -0.82   | 0.23 |
|                |            | EDSS (II)                         | 0.13    | 0.80 | 2.00    | <b>0.003</b> | -0.76   | 0.63 |
| Relapse        |            | ARR, untreated (I)                | 0.37    | 0.13 | 0.42    | 0.15         | 0.42    | 0.53 |
|                |            | ARR, all (II)                     | 0.25    | 0.34 | 0.78    | <b>0.014</b> | 0.57    | 0.42 |
| MRI            | volumetric | GM vol (% tot. Brain vol) (I)     | 0.14    | 0.61 | -0.55   | 0.09         | 0.96    | 0.12 |
|                |            | WM vol (% tot. Brain vol) (I)     | -0.29   | 0.43 | -0.77   | 0.09         | 0.90    | 0.29 |
|                |            | Lesion vol (mm <sup>3</sup> ) (I) | 0.26    | 0.38 | 1.07    | <b>0.005</b> | -0.94   | 0.48 |
|                | MTR        | Median MTR NAGM (I)               | -0.15   | 0.68 | -0.37   | 0.40         | 0.58    | 0.48 |
|                |            | Peak Height MTR NAGM (I)          | -0.49   | 0.11 | -0.25   | 0.49         | 0.09    | 0.89 |
|                |            | Median MTR NAWM (I)               | -0.06   | 0.86 | -0.58   | 0.20         | 0.62    | 0.47 |
|                |            | Peak Height MTR NAWM (I)          | -0.05   | 0.88 | -0.17   | 0.69         | 0.22    | 0.80 |
|                |            | Median MTR Lesion (I)             | 0.18    | 0.63 | -0.74   | 0.10         | 0.64    | 0.45 |
|                |            | Peak Height MTR Lesion (I)        | 0.23    | 0.51 | -0.75   | 0.08         | 0.42    | 0.61 |

Multiple linear regression was performed for markers which showed a nominally significant association with at least one outcome. A logarithmic transformation with base 10 for biomarker measurements, and an inverse rank normal transformation for outcome variables that are not normally distributed were applied. For MRI correlations, age at MRI, gender (for GM volume only) and MRI protocol were used as covariates. For CHI3L1, age, gender and rs4950928 genotype, and for CHIT1 rs150192398, were used as covariates. Primary (I) and secondary (II) outcomes are indicated. Nominally significant p-values (uncorrected  $P < 0.05$ ) are in bold.

ARMSS = Age Related Multiple Sclerosis Severity Score; MTR = magnetization transfer ratio, NAGM = normal appearing grey matter; NAWM = normal appearing white matter; GM = Grey matter; WM = White matter; AAR=annualized relapse rate

**Supplementary table 6. Association of functional genetic variation in *CHIT1* and *CHI3L1* genes with primary outcomes.**

| Variable                         | CHIT1       |         |         |     | CHI3L1    |         |         |     |
|----------------------------------|-------------|---------|---------|-----|-----------|---------|---------|-----|
|                                  | SNP         | $\beta$ | p-value | N   | SNP       | $\beta$ | p-value | N   |
| ARMSS                            | rs150192398 | 0.05    | 0.50    | 563 | rs4950928 | 0.07    | 0.37    | 563 |
| ARR, untreated                   | rs150192398 | 0.04    | 0.64    | 511 | rs4950928 | -0.04   | 0.60    | 511 |
| GM vol (% tot. Brain vol)        | rs150192398 | -0.20   | 0.42    | 208 | rs4950928 | 0.09    | 0.71    | 208 |
| WM vol (% tot. Brain vol)        | rs150192398 | 0.21    | 0.43    | 208 | rs4950928 | 0.09    | 0.75    | 208 |
| Lesion volume (mm <sup>3</sup> ) | rs150192398 | 0.32    | 0.35    | 208 | rs4950928 | -0.24   | 0.48    | 208 |
| Median MTR NAGM                  | rs150192398 | 0.09    | 0.72    | 208 | rs4950928 | 0.02    | 0.95    | 208 |
| Peak Height MTR NAGM             | rs150192398 | -0.06   | 0.84    | 208 | rs4950928 | 0.17    | 0.57    | 208 |
| Median MTR NAWM                  | rs150192398 | 0.16    | 0.49    | 208 | rs4950928 | -0.11   | 0.65    | 208 |
| Peak Height MTR NAWM             | rs150192398 | -0.21   | 0.48    | 208 | rs4950928 | 0.30    | 0.31    | 208 |
| Median MTR Lesion                | rs150192398 | 0.03    | 0.90    | 208 | rs4950928 | -0.02   | 0.95    | 208 |
| Peak Height MTR Lesion           | rs150192398 | -0.37   | 0.16    | 208 | rs4950928 | 0.46    | 0.09    | 208 |

$\beta$  (for major allele) and p-value from simple linear regression analysis. Age at MTR and MRI protocol were used as covariates for MRI outcomes. ARMSS = Age Related Multiple Sclerosis Severity Score, MTR = Magnetization transfer ratio, ARR=Annualized relapse rate
